# Supplementary material
Source: PubMed Central journal article supplement (PMC8440419)
Supplement: NIHMS1724774-supplement-2.pdf [file NIHMS1724774-supplement-2.pdf]

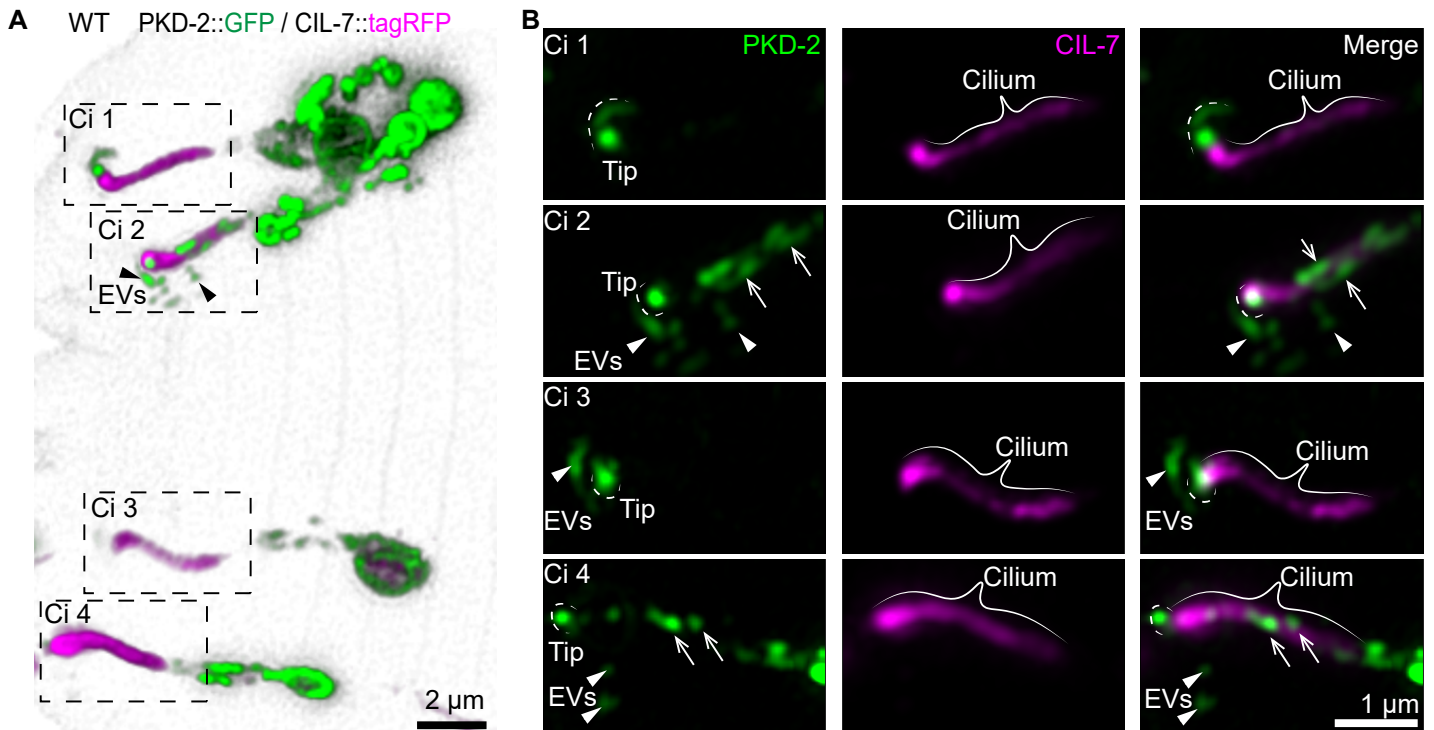

**Figure S1. CIL-7-mediated enrichment of PKD-2 at the ciliary tip is required for biogenesis of environmental EVs, related to Figure 2.**

A, Three-dimensional rendering model of a male head with all four CEM cilia showing PKD-2::GFP and CIL-7::tagRFP distributions in tip EVs, cilia, and base EVs. Each cilium is numbered and shown on close-up images on panel B. B, PKD-2::GFP enrichment at the ciliary tip is outlined by white dashed lines. White arrowheads indicate environmental EVs. White arrows indicate PKD-2::GFP captured along the ciliary shaft of Ci 2 and Ci 4. Scale bar 2 µm for A, 1 µm for B.

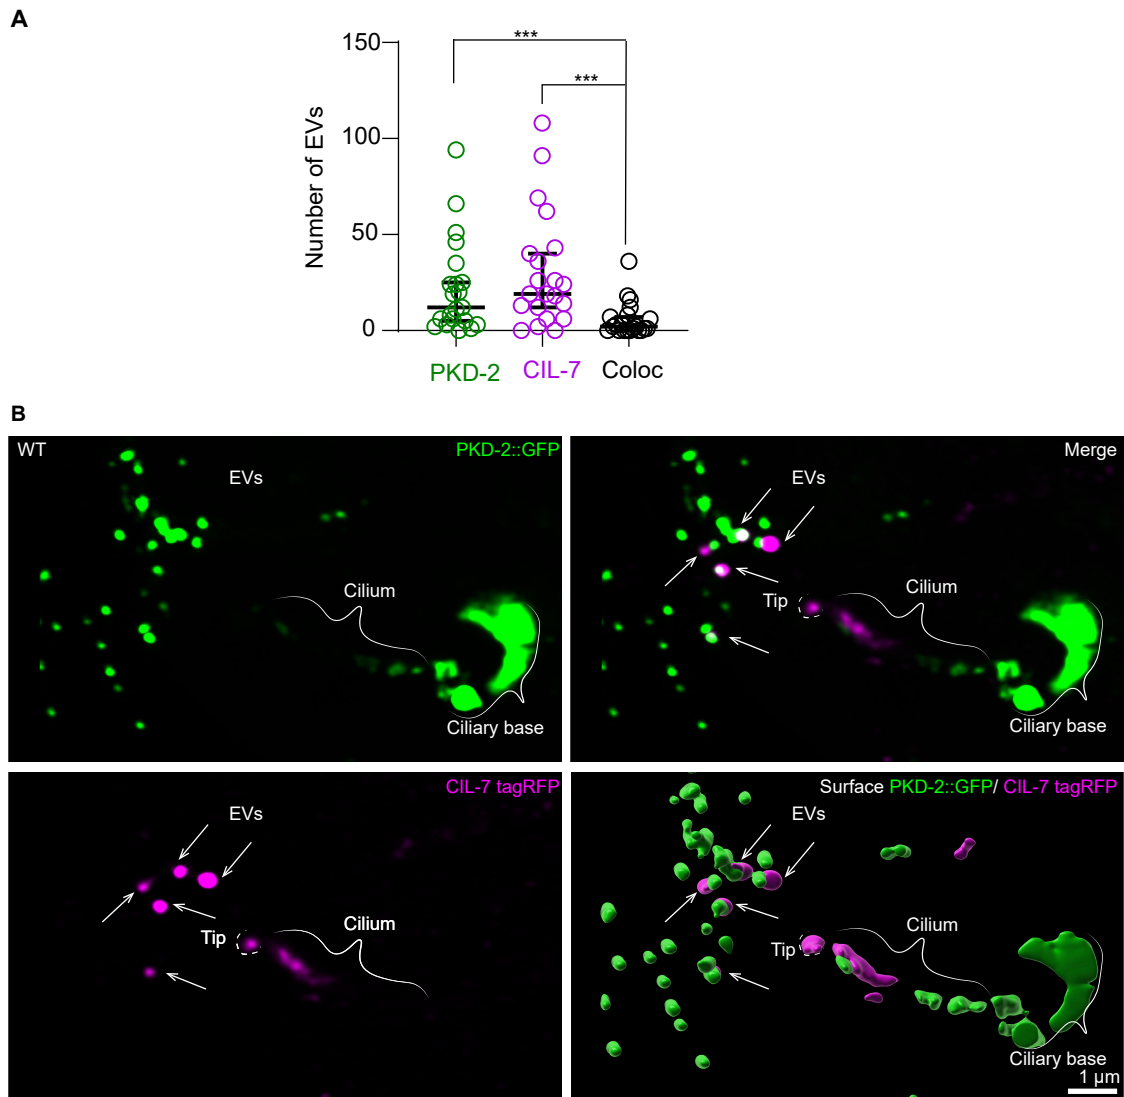

**Figure S2. PKD-2 and CIL-7 are sorted to distinct environmental EVs, related to Figure 2 and Figure 4.**

A, Analysis of colocalization of PKD-2 and CIL-7 on environmental EVs released from ciliary tips of adult wild-type isolated males. PKD-2 and CIL-7 are mostly sorted into separate EVs. The graph contains paired data where each data point represents number of EVs released from a single male head. Median values with 95% confidence intervals are indicated. \*\*\*  $p < 0.001$  by Friedman test,  $n = 21$ . B, Environmental EVs are observed in the vicinity of the releasing wild-type cilium. The image is captured at the moment of CIL-7 enrichment at the ciliary tip (outlined by dashed white line) that is about to separate from the cilium. White arrows point to CIL-7 EVs. Note each of the CIL-7 EVs stays connected with PKD-2 EVs after their release. Scale bar, 1  $\mu\text{m}$ .

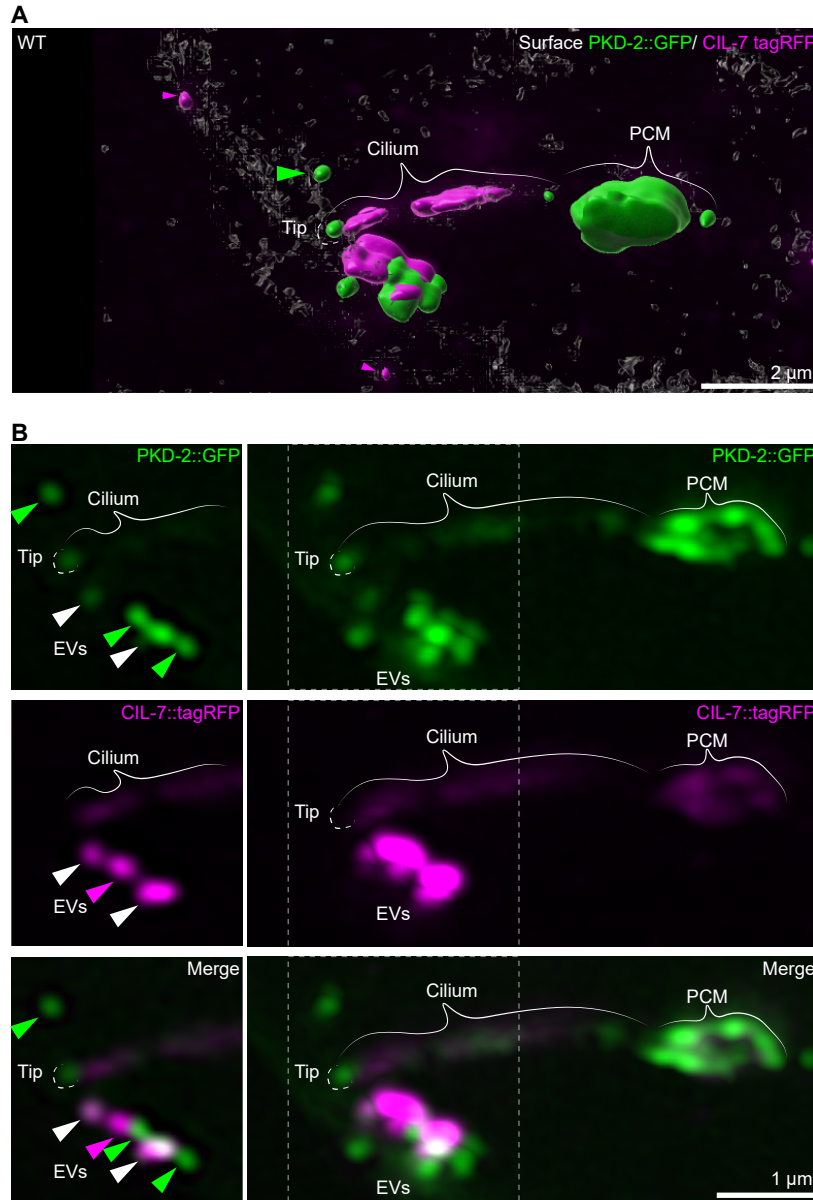

**Figure S3. Simultaneous release of PKD-2 and CIL-7 environmental EVs, related to Figure 2.**

A, Surface rendered image of PKD-2::GFP and CIL-7::tagRFP distribution along the cilium of a young adult male. PKD-2::GFP is enriched at the ciliary base and the ciliary tip. CIL-7::tagRFP is captured at a moment of forming a larger protrusion from the ciliary tip that still houses multiple PKD-2::GFP EVs not completely separated yet from the CIL-7-enriched launchpad. B, Split view of channels used to produce the surface rendered image on panel A. Left column shows a select focal plane from the Z-stack depicted at the right column; the featured area is marked by vertical dashed. On the single focal plane PKD-2 and CIL-7 EVs are alternating with each other within one string budding from the ciliary tip. Green arrowhead indicates the sole PKD-2 environmental EV; magenta arrowheads indicate the sole CIL-7 environmental EVs; white arrowheads show points of PKD-2 and CIL-7 colocalization. Scale bar, 2  $\mu$ m in A, 1  $\mu$ m in B.

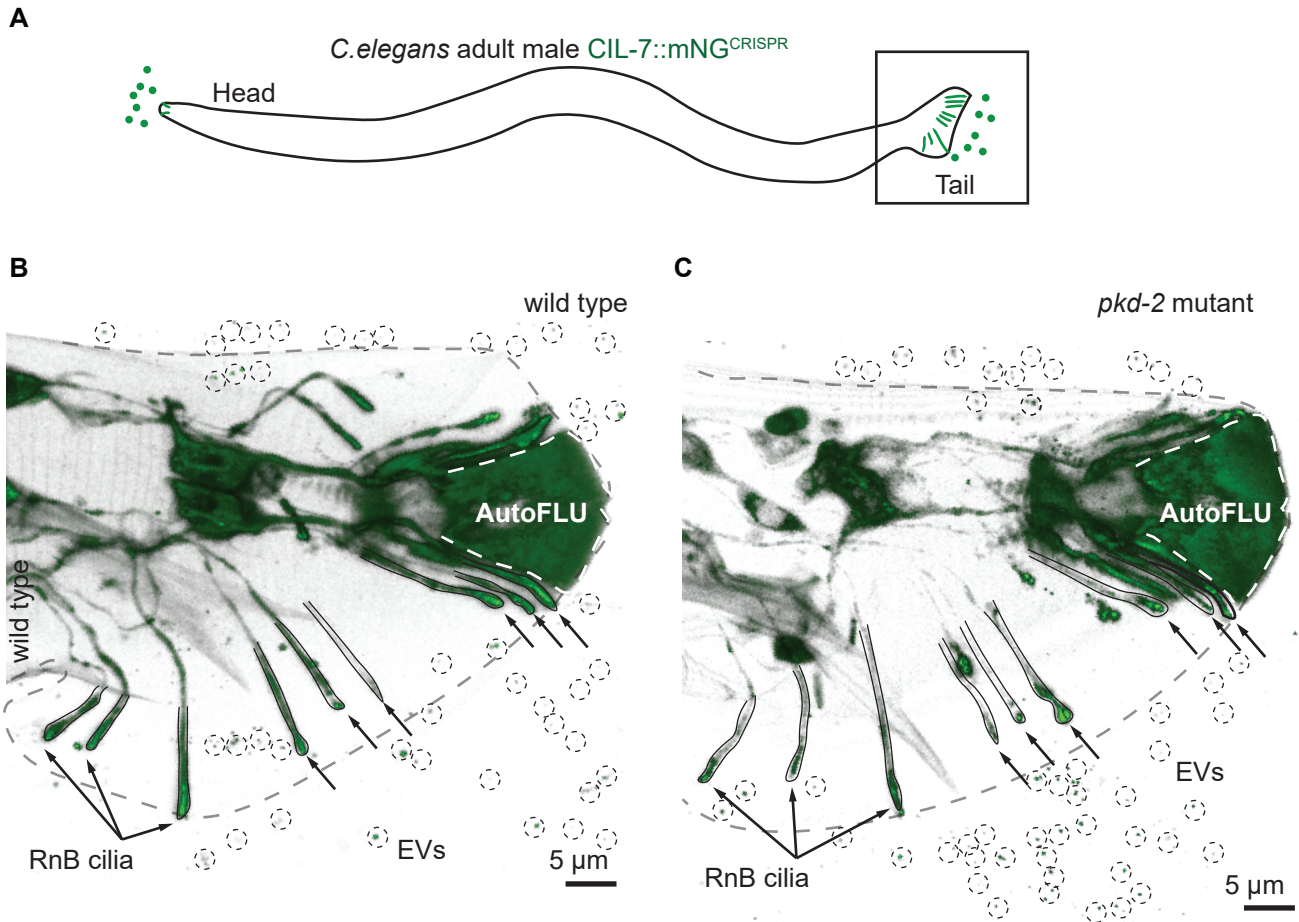

**Figure S4. PKD-2 is not essential for CIL-7 EV biogenesis, related to Figure 2.**

A, Cartoon of *C. elegans* adult male releasing EVs from the sensory neurons, and the imaged areas in the tail. B-C, Representative images of *C. elegans* adult male tail releasing CIL-7::mNeonGreen EVs from the EV releasing neurons (EVNs). CIL-7::mNeonGreen transgenic animals were generated by CRISPR in wild type (strain name PT3602), the transgenic line was crossed into the *pkd-2* mutant to generate the strain PT3621. In the wild type (B) and the *pkd-2* mutant (C), CIL-7 EVs are released by male-specific RnB (n=1-9) cilia (arrows point to the ciliary tips). Both ciliary localization and EV biogenesis in the RnB cilia look similar in wild type and in the *pkd-2* mutant (n=4 animals for wild type, n=5 animals for the *pkd-2* mutant). Circles indicate environmentally released EVs. “AutoFLU” and white dashed line indicate autofluorescence from the cuticular fan of the male tail. Scale bar, 5  $\mu$ m.

| Tip EV PKD-2 relative fluorescence | Ciliary shaft PKD-2 relative fluorescence | PCM + ciliary base EV PKD-2 relative fluorescence | Tip EVs observed | Base EV observed |
|------------------------------------|-------------------------------------------|---------------------------------------------------|------------------|------------------|
| 0.000                              | 0.171                                     | 0.829                                             | NO               | Yes              |
| 0.000                              | 0.208                                     | 0.792                                             | NO               | Yes              |
| 0.000                              | 0.065                                     | 0.935                                             | NO               | Yes              |
| 0.000                              | 0.118                                     | 0.882                                             | NO               | Yes              |
| 0.000                              | 0.251                                     | 0.749                                             | NO               | Yes              |
| 0.000                              | 0.011                                     | 0.989                                             | NO               | Yes              |
| 0.000                              | 0.001                                     | 0.999                                             | NO               | Yes              |
| 0.000                              | 0.000                                     | 1.000                                             | NO               | Yes              |
| 0.000                              | 0.228                                     | 0.772                                             | NO               | Yes              |
| 0.000                              | 0.034                                     | 0.966                                             | NO               | Yes              |
| 0.003                              | 0.048                                     | 0.950                                             | Yes              | Yes              |
| 0.003                              | 0.114                                     | 0.884                                             | Yes              | Yes              |
| 0.003                              | 0.140                                     | 0.857                                             | Yes              | Yes              |
| 0.005                              | 0.121                                     | 0.874                                             | Yes              | Yes              |
| 0.015                              | 0.130                                     | 0.855                                             | Yes              | Yes              |
| 0.017                              | 0.187                                     | 0.796                                             | Yes              | Yes              |
| 0.020                              | 0.265                                     | 0.715                                             | Yes              | Yes              |
| 0.029                              | 0.200                                     | 0.772                                             | Yes              | Yes              |
| 0.040                              | 0.392                                     | 0.568                                             | Yes              | Yes              |
| 0.057                              | 0.373                                     | 0.569                                             | Yes              | Yes              |
| 0.065                              | 0.065                                     | 0.870                                             | Yes              | Yes              |
| 0.068                              | 0.281                                     | 0.652                                             | Yes              | Yes              |
| 0.076                              | 0.037                                     | 0.887                                             | Yes              | Yes              |
| 0.080                              | 0.541                                     | 0.379                                             | Yes              | Yes              |
| 0.084                              | 0.337                                     | 0.580                                             | Yes              | Yes              |
| 0.106                              | 0.185                                     | 0.709                                             | Yes              | Yes              |
| 0.115                              | 0.313                                     | 0.572                                             | Yes              | Yes              |
| 0.120                              | 0.064                                     | 0.816                                             | Yes              | Yes              |
| 0.136                              | 0.035                                     | 0.829                                             | Yes              | Yes              |
| 0.161                              | 0.309                                     | 0.530                                             | Yes              | Yes              |
| 0.162                              | 0.630                                     | 0.208                                             | Yes              | Yes              |
| 0.203                              | 0.131                                     | 0.667                                             | Yes              | Yes              |
| 0.320                              | 0.440                                     | 0.239                                             | Yes              | Yes              |
| 0.428                              | 0.280                                     | 0.291                                             | Yes              | Yes              |
| 0.527                              | 0.205                                     | 0.268                                             | Yes              | Yes              |

**Table S1. Relative PKD-2 fluorescence intensity on the tip EVs, ciliary shaft, PCM and ciliary base EVs, related to Figure 1E-G.** Data is sorted by value of PKD-2 relative fluorescence intensity on tip EVs in the order of smallest to largest. Each data row represents the fraction of PKD-2 in each compartment of one cilium as determined by relative fluorescence intensity.
